# Supplementary material for: Differential accumulation of host mRNAs on polyribosomes during obligate pathogen-plant interactions
Source: Royal Society of Chemistry journal article supplement (doi:10.1039/c2mb25014d), 2012-05-04
Supplement: c2mb25014d_7.pdf [file c2mb25014d_7.pdf]

**Supplemental Table 6** Probesets identifying barley genes with high or low poly/total ratios in all comb treatments and genotypes (5% FDR).

| 258 low poly/total ratio (in all tested conditions; 5% FDR) | 115 high poly/total ratio (in all tested conditions; 5% FDR) |
|-------------------------------------------------------------|--------------------------------------------------------------|
| Contig10014_at                                              | Contig10478_s_at                                             |
| Contig10022_at                                              | Contig10495_s_at                                             |
| Contig10027_at                                              | Contig10738_at                                               |
| Contig10090_at                                              | Contig10771_s_at                                             |
| Contig10452_at                                              | Contig10800_at                                               |
| Contig10650_at                                              | Contig10942_at                                               |
| Contig10655_s_at                                            | Contig10994_s_at                                             |
| Contig1071_s_at                                             | Contig11061_at                                               |
| Contig10791_s_at                                            | Contig11107_at                                               |
| Contig10808_at                                              | Contig11138_at                                               |
| Contig10829_at                                              | Contig11259_at                                               |
| Contig11074_at                                              | Contig11381_at                                               |
| Contig11163_s_at                                            | Contig11522_at                                               |
| Contig11249_at                                              | Contig11864_at                                               |
| Contig11273_at                                              | Contig12065_at                                               |
| Contig11288_x_at                                            | Contig12284_at                                               |
| Contig11321_at                                              | Contig12592_at                                               |
| Contig11350_at                                              | Contig12650_s_at                                             |
| Contig11489_at                                              | Contig12706_at                                               |
| Contig11540_at                                              | Contig12897_at                                               |
| Contig11540_s_at                                            | Contig12938_at                                               |
| Contig11693_at                                              | Contig13989_at                                               |
| Contig11788_at                                              | Contig14024_at                                               |
| Contig11984_at                                              | Contig14285_at                                               |
| Contig12088_at                                              | Contig1431_at                                                |
| Contig12181_at                                              | Contig1437_s_at                                              |
| Contig12244_at                                              | Contig14516_at                                               |
| Contig12404_at                                              | Contig14585_at                                               |
| Contig12441_at                                              | Contig1483_at                                                |
| Contig12550_at                                              | Contig14918_at                                               |
| Contig13143_s_at                                            | Contig14999_at                                               |
| Contig13256_at                                              | Contig1591_s_at                                              |
| Contig13323_at                                              | Contig15950_at                                               |
| Contig13423_at                                              | Contig1604_at                                                |
| Contig1386_s_at                                             | Contig16595_at                                               |
| Contig13881_at                                              | Contig17498_at                                               |
| Contig13895_at                                              | Contig1774_at                                                |
| Contig14050_at                                              | Contig18277_at                                               |
| Contig14065_at                                              | Contig18280_at                                               |
| Contig14150_at                                              | Contig18335_at                                               |
| Contig14289_at                                              | Contig18640_at                                               |
| Contig14406_at                                              | Contig1952_at                                                |

|                  |                 |
|------------------|-----------------|
| Contig14715_at   | Contig1953_s_at |
| Contig15045_at   | Contig19814_at  |
| Contig15074_at   | Contig20079_at  |
| Contig15376_at   | Contig2019_s_at |
| Contig15658_at   | Contig21308_at  |
| Contig16214_at   | Contig21395_at  |
| Contig1632_at    | Contig2279_at   |
| Contig16445_at   | Contig2412_at   |
| Contig16506_at   | Contig275_x_at  |
| Contig16602_at   | Contig2762_at   |
| Contig16901_at   | Contig2837_at   |
| Contig17541_at   | Contig3181_at   |
| Contig17647_at   | Contig3414_s_at |
| Contig17793_s_at | Contig4016_s_at |
| Contig17867_at   | Contig4022_at   |
| Contig18234_at   | Contig4192_at   |
| Contig1852_at    | Contig4312_s_at |
| Contig1867_at    | Contig4345_at   |
| Contig18793_at   | Contig442_at    |
| Contig18873_at   | Contig4438_s_at |
| Contig1892_s_at  | Contig4520_at   |
| Contig19601_at   | Contig459_s_at  |
| Contig19855_s_at | Contig4727_at   |
| Contig20005_at   | Contig4773_at   |
| Contig20217_s_at | Contig4875_at   |
| Contig20294_at   | Contig4964_at   |
| Contig20627_at   | Contig5100_s_at |
| Contig2087_s_at  | Contig5296_s_at |
| Contig21008_at   | Contig5620_s_at |
| Contig2111_s_at  | Contig5985_at   |
| Contig2113_at    | Contig620_at    |
| Contig2275_s_at  | Contig6529_at   |
| Contig22906_at   | Contig6794_at   |
| Contig23198_s_at | Contig6991_s_at |
| Contig2346_at    | Contig6992_at   |
| Contig23488_at   | Contig7048_at   |
| Contig23771_at   | Contig7157_at   |
| Contig23806_at   | Contig7168_s_at |
| Contig2402_s_at  | Contig7244_at   |
| Contig2403_at    | Contig7327_at   |
| Contig24126_at   | Contig7373_at   |
| Contig2416_at    | Contig7373_s_at |
| Contig24266_at   | Contig7730_at   |
| Contig2447_x_at  | Contig7835_at   |
| Contig24680_at   | Contig7848_at   |
| Contig2495_s_at  | Contig7941_s_at |
| Contig25330_s_at | Contig7951_at   |
| Contig2546_at    | Contig7988_at   |
| Contig2555_at    | Contig7995_at   |

|                 |                      |
|-----------------|----------------------|
| Contig25779_at  | Contig8038_s_at      |
| Contig2663_at   | Contig8276_at        |
| Contig2670_x_at | Contig8326_at        |
| Contig2673_at   | Contig8899_at        |
| Contig2683_s_at | Contig8901_at        |
| Contig2792_s_at | Contig9108_at        |
| Contig2915_at   | Contig940_s_at       |
| Contig2932_at   | Contig9404_at        |
| Contig2988_s_at | Contig9449_at        |
| Contig3054_s_at | Contig9699_at        |
| Contig3112_at   | Contig9767_at        |
| Contig3155_s_at | Contig9784_at        |
| Contig3156_s_at | EBro01_SQ004_B20_at  |
| Contig3379_at   | HA26O09r_s_at        |
| Contig3391_at   | HF17H18r_s_at        |
| Contig3474_s_at | HT08D16r_s_at        |
| Contig3526_at   | HV05F02u_s_at        |
| Contig3574_s_at | HVSMEa0012N22r2_at   |
| Contig3596_at   | HVSMEa0014L12r2_s_at |
| Contig3675_at   | HVSMEb0013I11r2_s_at |
| Contig3746_at   | HVSMEg0015H13r2_s_at |
| Contig3750_at   | HW06C04u_s_at        |
| Contig3751_at   | HW08B21u_s_at        |
| Contig3801_at   | rbaal1d15_s_at       |
| Contig3812_at   |                      |
| Contig3857_at   |                      |
| Contig3923_at   |                      |
| Contig3992_at   |                      |
| Contig4073_at   |                      |
| Contig4074_at   |                      |
| Contig4187_at   |                      |
| Contig4206_at   |                      |
| Contig4211_at   |                      |
| Contig4212_s_at |                      |
| Contig4288_at   |                      |
| Contig4337_at   |                      |
| Contig4441_at   |                      |
| Contig4515_at   |                      |
| Contig4586_at   |                      |
| Contig4659_at   |                      |
| Contig4671_at   |                      |
| Contig4714_s_at |                      |
| Contig4722_at   |                      |
| Contig4748_s_at |                      |
| Contig4805_at   |                      |
| Contig4911_at   |                      |
| Contig4997_s_at |                      |
| Contig5113_at   |                      |
| Contig5329_at   |                      |

|                 |  |
|-----------------|--|
| Contig5487_s_at |  |
| Contig5523_s_at |  |
| Contig5645_at   |  |
| Contig5847_at   |  |
| Contig5870_at   |  |
| Contig5916_at   |  |
| Contig5996_s_at |  |
| Contig6110_at   |  |
| Contig6218_at   |  |
| Contig6308_at   |  |
| Contig6337_at   |  |
| Contig6351_at   |  |
| Contig6411_at   |  |
| Contig6602_at   |  |
| Contig6704_at   |  |
| Contig6708_at   |  |
| Contig6754_at   |  |
| Contig6819_at   |  |
| Contig6871_s_at |  |
| Contig6939_at   |  |
| Contig717_x_at  |  |
| Contig721_at    |  |
| Contig721_s_at  |  |
| Contig7304_s_at |  |
| Contig7305_at   |  |
| Contig7320_at   |  |
| Contig7377_at   |  |
| Contig7484_at   |  |
| Contig7500_at   |  |
| Contig7658_at   |  |
| Contig7861_at   |  |
| Contig7927_at   |  |
| Contig7953_at   |  |
| Contig7958_s_at |  |
| Contig8033_at   |  |
| Contig8068_at   |  |
| Contig8190_at   |  |
| Contig8375_at   |  |
| Contig8484_at   |  |
| Contig8596_at   |  |
| Contig875_s_at  |  |
| Contig8794_s_at |  |
| Contig8882_at   |  |
| Contig8927_at   |  |
| Contig9000_at   |  |
| Contig9006_at   |  |
| Contig9092_at   |  |
| Contig9107_at   |  |
| Contig9211_at   |  |

|                       |  |
|-----------------------|--|
| Contig9212_s_at       |  |
| Contig9319_at         |  |
| Contig935_at          |  |
| Contig9351_s_at       |  |
| Contig9357_at         |  |
| Contig9409_s_at       |  |
| Contig9432_at         |  |
| Contig959_x_at        |  |
| Contig9681_at         |  |
| Contig9709_s_at       |  |
| Contig972_x_at        |  |
| Contig9724_at         |  |
| Contig9797_at         |  |
| Contig9954_at         |  |
| EBem08_SQ004_K18_at   |  |
| EBem10_SQ004_P21_x_at |  |
| EBma03_SQ003_J21_s_at |  |
| EBpi01_SQ004_D06_s_at |  |
| EBro01_SQ001_C04_at   |  |
| EBro02_SQ008_C12_s_at |  |
| HA13O21r_s_at         |  |
| HB18O02r_at           |  |
| HD04N07u_at           |  |
| HF11O19r_at           |  |
| HO03L07S_at           |  |
| HO08B11S_at           |  |
| HS05B02u_s_at         |  |
| HS17117u_s_at         |  |
| HS18110r_s_at         |  |
| HT11O15u_s_at         |  |
| HT12G07u_s_at         |  |
| HU08D12u_at           |  |
| HU11D20u_s_at         |  |
| HU12E11u_s_at         |  |
| HU14O16u_s_at         |  |
| HV_CEA0009O11f2_x_at  |  |
| HV_CEA0013E09r2_at    |  |
| HV_CEb0010C12r2_at    |  |
| HV_CEb0010H17r2_at    |  |
| HV10A20u_s_at         |  |
| HV14K05u_s_at         |  |
| HVSMEa0002E06r2_s_at  |  |
| HVSMEa0005O15r2_s_at  |  |
| HVSMEb0004L16r2_at    |  |
| HVSMEb0010E16r2_s_at  |  |
| HVSMEb0013P12r2_at    |  |
| HVSMEc0006P11r2_at    |  |
| HVSMEf0015M13r2_s_at  |  |
| HVSMEg0002E24r2_s_at  |  |

|                      |  |
|----------------------|--|
| HVSMEg0011O17r2_s_at |  |
| HVSMEm0003G02r2_at   |  |
| HVSMEn0009D08r2_at   |  |
| HVSMEn0019D12r2_s_at |  |
| HVSMEn0023O21f_s_at  |  |
| HW01P03u_s_at        |  |
| HW02O09u_s_at        |  |
| HW07E14u_s_at        |  |
| HW08K10u_s_at        |  |
| HX08J20r_at          |  |
| HY09L01u_s_at        |  |
| HZ50B24r_s_at        |  |
| HZ62K09r_at          |  |
| rbaak13h13_s_at      |  |
| rbaal20l21_s_at      |  |
| rbags13e14_s_at      |  |
| rbasd16a13_s_at      |  |
| X68656_s_at          |  |
| baal31g17_s_at       |  |
| basd23g06_s_at       |  |

binations of
